# Supplementary material for: C-Terminal Redox Domain of Arabidopsis APR1 Is a Non-Canonical Thioredoxin Domain with Glutaredoxin Function
Source: MDPI journal article supplement (doi:10.3390/antiox8100461), 2019-10-08
Supplement: s1 [file s1]

## Supplementary Information

### **C-terminal redox domain of *Arabidopsis* APR1 is a non-canonical thioredoxin domain with glutaredoxin function**

Fang-Fang Chen<sup>1,#</sup>, Chia-Yu Chien<sup>1,#</sup>, Chao-Cheng Cho<sup>2</sup>, Yu-Yung Chang<sup>1</sup>, and Chun-Hua Hsu<sup>1,2,\*</sup>

<sup>1</sup>Department of Agricultural Chemistry, National Taiwan University, Taipei 10617, Taiwan

<sup>2</sup>Genome and Systems Biology Degree Program, National Taiwan University and Academia Sinica, Taipei 10617, Taiwan

<sup>#</sup>These two authors contribute equally.

\*Corresponding author:

[andyhsu@ntu.edu.tw](mailto:andyhsu@ntu.edu.tw) (C.-H. Hsu).

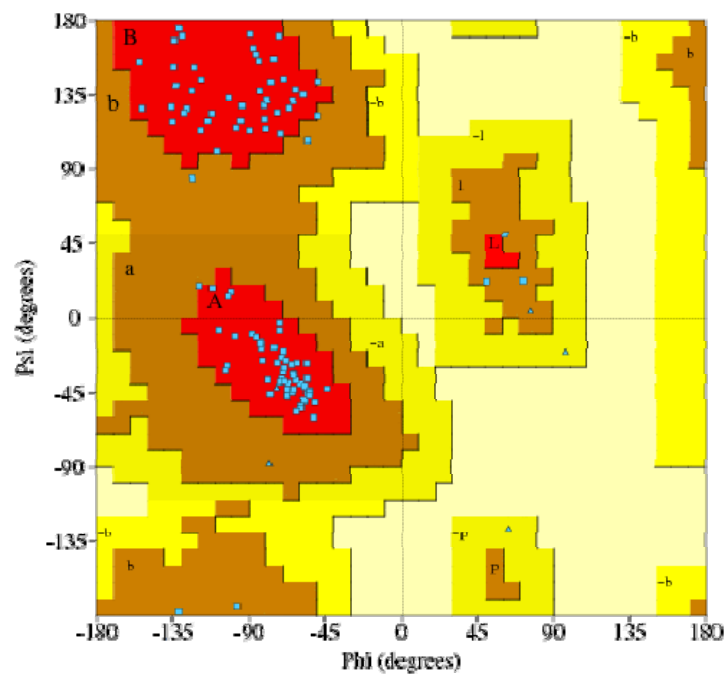

Supplementary Figure S1.

Ramachandran plot for the phi-psi values of the crystal structure of AtAPR1 redox domain. This figure was produced using PROCHECK.

Supplementary Table S1.

DALI comparisons using the structure of AtAPR1 redox domain protein that is closest to the mean of the ensemble PDB Z-score sequence identity protein

| Symbol | PDB  | Z-score | RMSD | %id        | description                                                                                 |
|--------|------|---------|------|------------|---------------------------------------------------------------------------------------------|
| A      | 5YRY |         |      | This study | The C-terminal redox domain of APR1 from <i>Arabidopsis thaliana</i>                        |
| B      | 3Q6O | 13.9    | 2.3  | 19%        | Sulfhydryl oxidase 1 from <i>Homo sapiens</i>                                               |
| C      | 4P2L | 13.8    | 2.4  | 20%        | Sulfhydryl oxidase 1 from <i>Rattus norvegicus</i>                                          |
| D      | 3APQ | 13.7    | 2.4  | 21%        | J-Trx1 fragment of ERdj5 (ER-resident protein disulfide reductase) from <i>Mus musculus</i> |
| E      | 3APS | 13.2    | 2.6  | 20%        | TRX4 domain of ERdj5 (ER-resident protein disulfide reductase) from <i>Mus musculus</i>     |
| F      | 1EP7 | 12.9    | 2.5  | 15%        | H-type Thioredoxin from <i>Chlamydomonas reinhardtii</i>                                    |
| G      | 4EF0 | 12.8    | 2.7  | 25%        | First catalytic domain of protein disulfide isomerase P5 from <i>Homo sapiens</i>           |
| H      | 2YOI | 12.7    | 2.4  | 14%        | LECA (Last Eukaryotes Common Ancestor) Thioredoxin                                          |

Abbreviations:

Z-score: normalized score that depends on the size of the structures

RMSD: root-mean-square deviation of C $\alpha$  atoms in the least-squares superimposition of the structurally equivalent C $\alpha$  atoms

%id: percentage of identical amino acids over all structurally equivalent residues

Description: the COMPND record from the PDB entry

Supplementary Table S2.

RMSD calculation of four helices between AtAPR1 redox domain protein (PDB code: 5YRY) and the structural relatives.

|        |      | RMSD values             |                          |                          |                           |
|--------|------|-------------------------|--------------------------|--------------------------|---------------------------|
| Symbol | PDB  | $\alpha$ 1 helix (7-17) | $\alpha$ 2 helix (33-51) | $\alpha$ 3 helix (65-74) | $\alpha$ 4 helix (98-111) |
| A      | 5YRY |                         |                          |                          |                           |
| B      | 3Q6O | 12.421                  | 0.778                    | 6.558                    | 4.507                     |
| C      | 4P2L | 6.960                   | 0.948                    | 6.649                    | 4.681                     |
| D      | 3APQ | 4.552                   | 0.679                    | 2.819                    | 4.317                     |
| E      | 3APS | 11.044                  | 0.920                    | 9.356                    | 3.869                     |
| F      | 1EP7 | 5.190                   | 1.872                    | 4.615                    | 3.049                     |
| G      | 4EF0 | 8.774                   | 0.951                    | 9.430                    | 3.970                     |
| H      | 2YOI | 13.664                  | 1.838                    | 4.079                    | 4.343                     |

RMSD calculation was performed by using PyMol.
